# Supplementary material
Source: PubMed Central journal article supplement (PMC3399947)
Supplement: NIHMS369531-supplement-01.pdf [file NIHMS369531-supplement-01.pdf]

**Table S1:** Sample characteristics and Performance of CKD-EPI equation over time by Study

A: MDRD Study

| Variable              | Baseline |      | Follow-up (months) |      |      |      |      |      |      |      |      |      |      | Closeout | Post Close out |
|-----------------------|----------|------|--------------------|------|------|------|------|------|------|------|------|------|------|----------|----------------|
|                       | 1        | 2    | 2                  | 4    | 8    | 12   | 16   | 20   | 24   | 28   | 32   | 36   | 40   |          |                |
| Sample Size           | 840      | 830  | 744                | 740  | 713  | 703  | 654  | 533  | 436  | 348  | 246  | 134  | 30   | 619      | 479            |
| Scr (mg/dl), mean     | 2.2      | 2.3  | 2.3                | 2.4  | 2.5  | 2.7  | 2.7  | 2.7  | 2.8  | 2.9  | 3.0  | 3.1  | 3.3  | 2.6      | 2.8            |
| Measured GFR, mean    | 33.5     | 32.5 | 31.1               | 30.5 | 29.8 | 29.1 | 28.8 | 28.3 | 27.3 | 27.4 | 26.3 | 25.9 | 25.6 | 28.6     | 27.3           |
| Estimated GFR, mean   | 35.6     | 34.4 | 33.4               | 33.2 | 31.9 | 31.0 | 30.8 | 29.8 | 29.1 | 29.1 | 28.2 | 27.4 | 25.6 | 31.5     | 30.0           |
| Mean Error            | -2.1     | -1.9 | -2.3               | -2.6 | -2.0 | -1.9 | -2.0 | -1.5 | -1.8 | -1.6 | -1.9 | -1.5 | 0.0  | -2.8     | -2.7           |
| Median Error          | -1.5     | -1.3 | -1.6               | -1.9 | -1.3 | -1.3 | -1.4 | -0.7 | -0.9 | -0.8 | -1.1 | -1.0 | 0.5  | -2.2     | -1.8           |
| Mean Absolute Error   | 5.1      | 4.7  | 4.9                | 4.9  | 4.7  | 4.4  | 4.5  | 4.2  | 4.4  | 4.8  | 4.4  | 4.9  | 3.9  | 4.8      | 4.7            |
| Median Absolute Error | 3.7      | 3.5  | 3.7                | 3.6  | 3.3  | 3.0  | 3.1  | 2.9  | 3.2  | 3.2  | 2.8  | 2.8  | 2.4  | 3.4      | 2.9            |
| IQR of Error          | 23.3     | 20.9 | 21.4               | 23.1 | 23.7 | 23.2 | 22.4 | 21.2 | 19.7 | 24.7 | 27.2 | 24.8 | 19.5 | 22.0     | 19.1           |
| SD of Error           | 6.7      | 6.1  | 6.2                | 6.3  | 6.5  | 6.0  | 5.8  | 5.8  | 5.8  | 6.8  | 6.5  | 7.4  | 5.5  | 5.9      | 5.9            |
| P <sub>30</sub> (%)   | 87.3     | 86.4 | 83.9               | 83.4 | 84.9 | 84.5 | 84.1 | 85.4 | 84.6 | 82.5 | 85.4 | 80.6 | 86.7 | 81.9     | 83.5           |

Visit 1 refers to first GFR performed during the baseline phase. For 9 of the 840 participants, this occurred at the second visit.

The follow-up month refers to time since randomization. Close out and post close out visits occurred at the end of the follow-up for each subject and modeled according to the follow-up time when they occurred. Error refers to measured GFR minus estimated GFR. Scr, serum creatinine; GFR, glomerular filtration rate. Units for GFR and error are ml/min per 1.73 m<sup>2</sup>; IQR, interquartile range, SD, standard deviation, P<sub>30</sub>, percentage of estimates within 30% of measured GFR

B. AASK

|                       | Baseline | Follow-up (months) |      |      |      |      |      |      |      |      |      |      |      |      |
|-----------------------|----------|--------------------|------|------|------|------|------|------|------|------|------|------|------|------|
|                       | 1        | 3                  | 6    | 12   | 18   | 24   | 30   | 36   | 42   | 48   | 54   | 62   | 66   | 72   |
| Sample Size           | 1094     | 838                | 861  | 859  | 787  | 736  | 697  | 686  | 561  | 473  | 392  | 315  | 183  | 98   |
| Scr (mg/dl), mean     | 1.8      | 1.8                | 1.9  | 1.9  | 2.0  | 2.0  | 1.9  | 2.0  | 1.9  | 2.0  | 2.0  | 2.0  | 2.1  | 2.2  |
| Measured GFR, mean    | 45.6     | 46.0               | 46.0 | 45.7 | 45.4 | 45.2 | 44.7 | 43.9 | 45.2 | 44.8 | 44.6 | 43.2 | 42.3 | 39.2 |
| Estimated GFR, mean   | 49.9     | 49.7               | 49.4 | 49.2 | 49.0 | 49.0 | 48.7 | 47.8 | 48.6 | 47.9 | 47.1 | 45.6 | 45.5 | 42.9 |
| Mean Error            | -4.3     | -3.7               | -3.4 | -3.6 | -3.6 | -3.8 | -4.0 | -3.8 | -3.3 | -3.1 | -2.5 | -2.4 | -3.2 | -3.7 |
| Median Error          | -3.0     | -3.0               | -3.0 | -2.9 | -2.8 | -2.7 | -2.8 | -3.2 | -2.2 | -2.3 | -1.5 | -2.5 | -1.6 | -2.7 |
| Mean Absolute Error   | 8.3      | 7.9                | 8.2  | 8.1  | 7.4  | 7.8  | 8.2  | 8.0  | 8.1  | 8.1  | 7.3  | 8.1  | 7.9  | 7.2  |
| Median Absolute Error | 6.3      | 6.1                | 6.3  | 5.9  | 5.8  | 5.4  | 5.7  | 5.7  | 5.5  | 5.5  | 5.0  | 6.1  | 5.7  | 6.2  |
| IQR of Error          | 38.4     | 34.4               | 31.6 | 41.6 | 33.4 | 35.7 | 38.2 | 38.2 | 39.0 | 41.7 | 32.0 | 36.1 | 39.2 | 42.3 |
| SD of Error           | 10.4     | 9.9                | 10.4 | 10.5 | 9.3  | 10.4 | 10.8 | 10.3 | 11.5 | 11.3 | 10.1 | 11.1 | 10.5 | 9.0  |
| P <sub>30</sub> (%)   | 82.4     | 79.6               | 82.1 | 81.8 | 82.8 | 81.1 | 79.6 | 79.0 | 81.5 | 81.2 | 81.9 | 78.7 | 75.4 | 75.5 |

Numbers here are 69 less than the total used in the mixed model as some people had more than one measured GFR within a specified time period and there are 3 people who had 2 baseline visits. Error refers to measured GFR minus estimated GFR  
 Scr, serum creatinine; GFR, glomerular filtration rate. Units for GFR and error are ml/min per 1.73 m<sup>2</sup>; IQR, interquartile range, SD, standard deviation, P<sub>30</sub>, percentage of estimates within 30% of measured GFR

C. CSG

|                       | Baseline | Follow-up (years) |      |      |      |
|-----------------------|----------|-------------------|------|------|------|
|                       |          | 1                 | 2    | 3    | 4    |
| Sample Size           | 360      | 246               | 210  | 125  | 49   |
| Scr (mg/dl), mean     | 1.2      | 1.4               | 1.4  | 1.4  | 1.5  |
| Measured GFR, mean    | 75.3     | 68.2              | 67.2 | 67.5 | 69.2 |
| Estimated GFR, mean   | 77.3     | 70.5              | 71.4 | 70.8 | 71.7 |
| Mean Error            | -2.0     | -2.2              | -4.2 | -3.2 | -2.5 |
| Median Error          | -3.3     | -3.7              | -3.7 | -4.5 | -4.1 |
| Mean Absolute Error   | 12.9     | 12.8              | 10.6 | 13.0 | 12.3 |
| Median Absolute Error | 9.2      | 9.7               | 8.7  | 9.6  | 10.1 |
| IQR of Error          | 50.0     | 48.7              | 39.4 | 35.0 | 31.0 |
| SD of Error           | 18.3     | 18.2              | 13.4 | 17.5 | 16.8 |
| P <sub>30</sub> (%)   | 80.8     | 80.5              | 77.6 | 69.6 | 77.6 |

Numbers here are 6 less than the total used in the mixed model as some people had more than one measured GFR within a specified time period and data from year 5 are not shown due to small sample size (N=2).

Error refers to measured GFR –estimated GFR. Scr, serum creatinine; GFR, glomerular filtration rate. Units of GFR are ml/min per 1.73 m<sup>2</sup>; IQR, interquartile range, SD, standard deviation, P<sub>30</sub>, percentage of estimates within 30% of measured GFR

D. DCCT

|                       | Baseline | Follow-up (years) |       |       |       |       |
|-----------------------|----------|-------------------|-------|-------|-------|-------|
|                       |          | 1                 | 2     | 3     | 4     | 5     |
| Sample Size           | 1237     | 45                | 132   | 343   | 153   | 118   |
| Scr (mg/dl), mean     | 0.8      | 0.7               | 0.8   | 0.8   | 0.8   | 0.8   |
| Measured GFR, mean    | 123.9    | 120.6             | 124.7 | 119.8 | 120.8 | 123.2 |
| Estimated GFR, mean   | 117.2    | 117.5             | 116.6 | 114.7 | 112.1 | 116.1 |
| Mean Error            | 6.7      | 3.1               | 8.1   | 5.1   | 8.6   | 7.1   |
| Median Error          | 5.0      | 0.0               | 8.4   | 3.7   | 7.1   | 4.9   |
| Mean Absolute Error   | 16.5     | 12.7              | 16.6  | 15.3  | 16.0  | 17.0  |
| Median Absolute Error | 12.1     | 10.7              | 13.5  | 11.8  | 11.7  | 13.0  |
| IQR of Error          | 63.0     | 43.4              | 54.6  | 57.9  | 54.2  | 57.4  |
| SD of Error           | 21.8     | 16.2              | 19.6  | 20.2  | 20.2  | 22.4  |
| P <sub>30</sub> (%)   | 92.2     | 97.8              | 96.2  | 93.6  | 91.5  | 91.5  |

Baseline refers to the first GFR measurement of the study. Since GFR measurements were started midway through the study, these do not correspond to the study baseline. Numbers here are 11 less than the total used in the mixed model as some people had more than one measured GFR within a specified time period (N=1) and data from year 6 are not shown due to small sample size (N=10). Error refers to measured GFR minus estimated GFR

Scr, serum creatinine; GFR, glomerular filtration rate. Units for GFR and error are ml/min per 1.73 m<sup>2</sup>; IQR, interquartile range, SD, standard deviation, P<sub>30</sub>, percentage of estimates within 30% of measured GFR
